# Supplementary material for: Boosting the electrochemical performance and moisture stability of O3-type NaNi1/3Fe1/3Mn1/3O2 cathodes using novel Na2MoO4 coatings prepared via a polyvinylpyrrolidone-anchored complex coating process
Source: Royal Society of Chemistry journal article supplement (doi:10.1039/d3ta06034a), 2023-12-05
Supplement: d3ta06034a1.pdf [file d3ta06034a1.pdf]

## Electronic Supplementary Information

# Boosting the Electrochemical Performance and Moisture Stability of O3-type $\text{NaNi}_{1/3}\text{Fe}_{1/3}\text{Mn}_{1/3}\text{O}_2$ Cathodes using Novel $\text{Na}_2\text{MoO}_4$ Coatings Prepared via a Polyvinylpyrrolidone-anchored Complex Coating Process

Minjun Kim<sup>a</sup>, Minsu Choi<sup>a</sup> and Wonchang Choi<sup>a\*</sup>

<sup>a</sup>Department of Energy Engineering, Konkuk University, 120, Neungdong-ro, Gwangjin-gu, Seoul 05029, Republic of Korea

\*Corresponding author Tel.: +82 2-2049-6051

E-mail address: [wchoi@konkuk.ac.kr](mailto:wchoi@konkuk.ac.kr) (Prof. W. Choi)

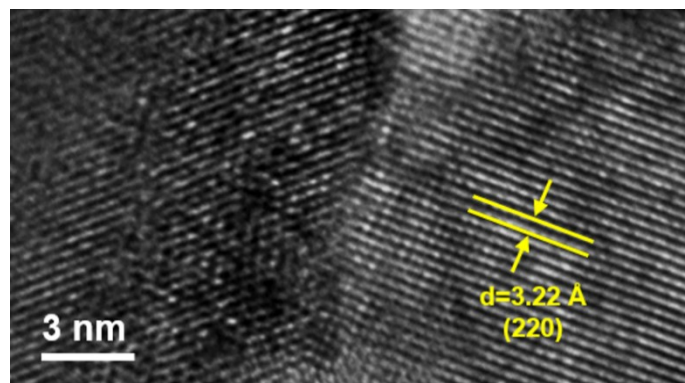

**Fig. S1.** HR-TEM image of 2wt% NMO-NFM at interface between bulk and coating layer.

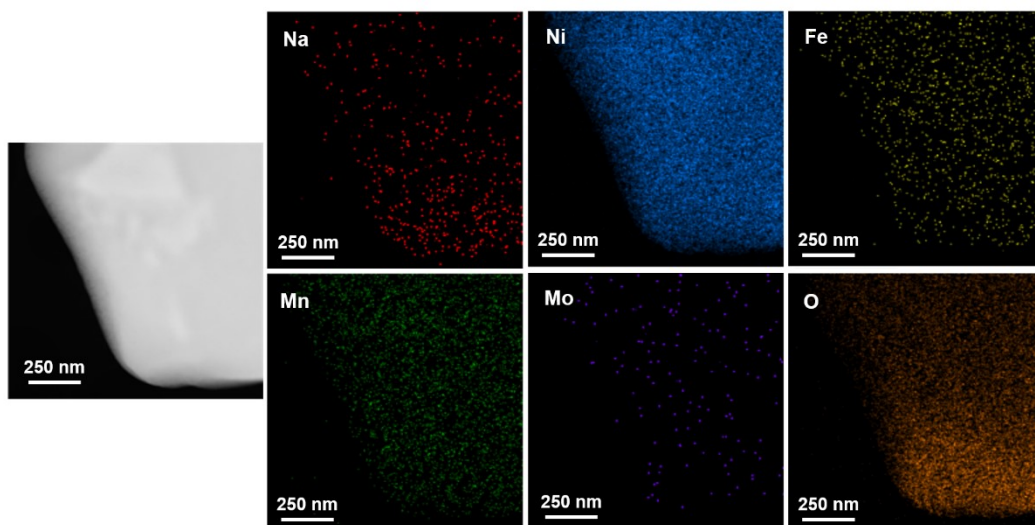

**Fig. S2.** EDS mapping images of Na, Ni, Fe, Mn, Mo, and O in 1 wt% NMO-NFM.

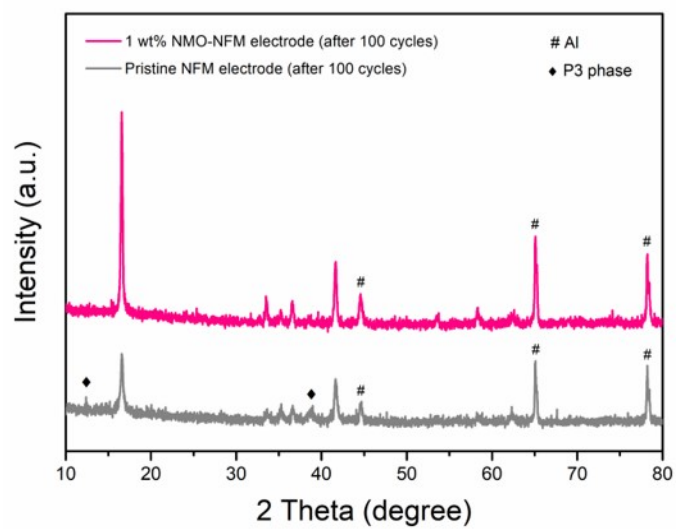

**Fig. S3.** XRD patterns of cycled pristine NFM and 1 wt% NMO-NFM electrodes (after 1C for 10 cycles).

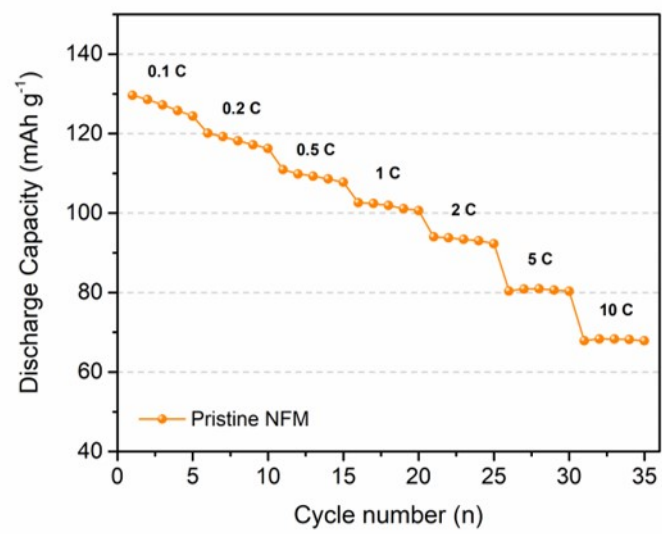

**Fig. S4.** Rate capability at various current densities for 0.5 wt% NMO-NFM.

**Table. S1** Element analysis tested by ICP-MS for the pristine NFM, 1 wt% NMO-NFM and 2 wt% NMO-NFM cathode materials.

|               | Na (wt%) | Ni (wt%) | Fe (wt%) | Mn (wt%) | Mo (wt%) | Na <sub>2</sub> MoO <sub>4</sub> (wt%)<br>† |
|---------------|----------|----------|----------|----------|----------|---------------------------------------------|
| Pristine NFM  | 21.06    | 18.10    | 17.07    | 16.71    | -        | -                                           |
| 1 wt% NMO-NFM | 21.38    | 18.01    | 17.01    | 16.65    | 0.21     | 0.95                                        |
| 2 wt% NMO-NFM | 21.65    | 17.87    | 16.95    | 16.28    | 0.44     | 1.98                                        |

†Calculated based on the Mo content from ICP-MS.

**Table. S2** Comparison of the electrochemical performance of 1 wt% NMO-NFM and other SIBs cathode materials.

| Ref.      | Cathode                                                                                      | Modification                                              | Voltage range (V) | Discharge capacity at 0.1C (mAh cm <sup>-1</sup> ) | Discharge capacity at 10C (mAh cm <sup>-1</sup> ) | Electrolyte                                        |
|-----------|----------------------------------------------------------------------------------------------|-----------------------------------------------------------|-------------------|----------------------------------------------------|---------------------------------------------------|----------------------------------------------------|
| This work | NaNi <sub>1/3</sub> Fe <sub>1/3</sub> Mn <sub>1/3</sub> O <sub>2</sub>                       | Na <sub>2</sub> MoO <sub>4</sub> coating                  | 2.0–4.0           | 127.96                                             | 81.13                                             | 1M NaClO <sub>4</sub> in EC:PC:DEC=1:1:1+3 wt% FEC |
| [26]      | NaNi <sub>1/3</sub> Fe <sub>1/3</sub> Mn <sub>1/3</sub> O <sub>2</sub>                       | TiO <sub>2</sub> coating                                  | 1.5–4.2           | 160.9                                              | 30.0                                              | 1M NaClO <sub>4</sub> in PC                        |
| [27]      | NaNi <sub>1/3</sub> Fe <sub>1/3</sub> Mn <sub>1/3</sub> O <sub>2</sub>                       | ZrO <sub>2</sub> coating                                  | 1.5–4.0           | 123.8                                              | 59.9                                              | 1M NaClO <sub>4</sub> in PC                        |
| [47]      | NaNi <sub>1/3</sub> Fe <sub>1/3</sub> Mn <sub>1/3</sub> O <sub>2</sub>                       | NaTi <sub>2</sub> (PO <sub>4</sub> ) <sub>3</sub> coating | 1.5–4.2           | 164.1                                              | 68.2                                              | 1M NaClO <sub>4</sub> in PC+5 vol% FEC             |
| [55]      | NaMn <sub>0.48</sub> Ni <sub>0.2</sub> Fe <sub>0.3</sub> Mg <sub>0.02</sub> O <sub>2</sub>   | Mg doping                                                 | 1.5–4.2           | 136                                                | 10                                                | 1M NaClO <sub>4</sub> in PC                        |
| [56]      | NaFe <sub>0.25</sub> Mn <sub>0.25</sub> Ni <sub>0.25</sub> Ti <sub>0.25</sub> O <sub>2</sub> | Ti doping                                                 | 1.5–4.0           | 145                                                | 59.5                                              | 1M NaPF <sub>6</sub> in PC+2t% FEC                 |
